# Supplementary material
Source: PubMed Central journal article supplement (PMC11251731)
Supplement: NIHMS2006786-supplement-1.pdf [file NIHMS2006786-supplement-1.pdf]

1026 **Appendix**

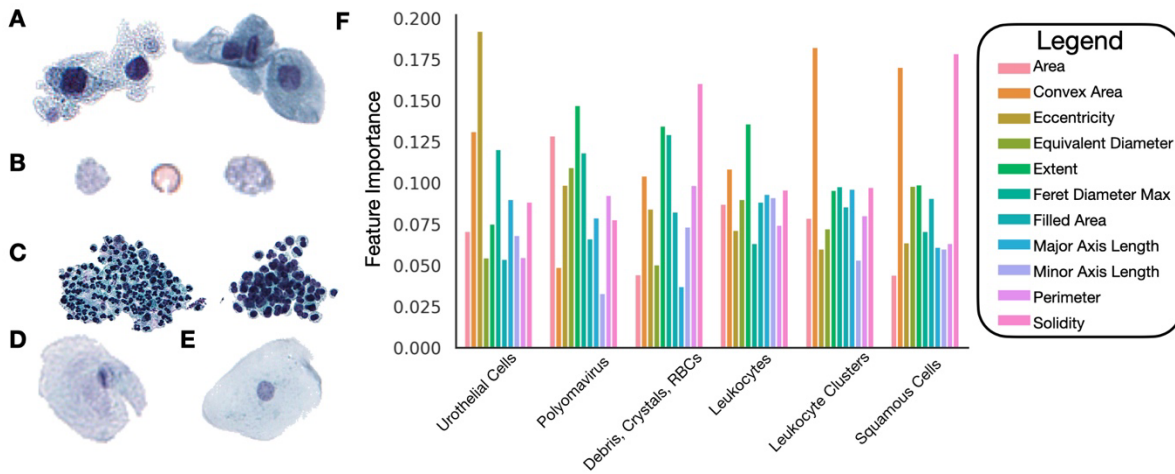

1027 **Supplementary Figure 1: Important morphometric measures:** A) Urothelial cells with high  
 1028 eccentricity; B) RBCs and crystals with high solidity; C) Leukocyte clusters with high convex  
 1029 area; D) Squamous cell with high convex area; E) Squamous cell with high solidity; F)  
 1030 Important morphometric features as determined using IntegratedGradients to accompany raw  
 1031 image features  
 1032  
 1033

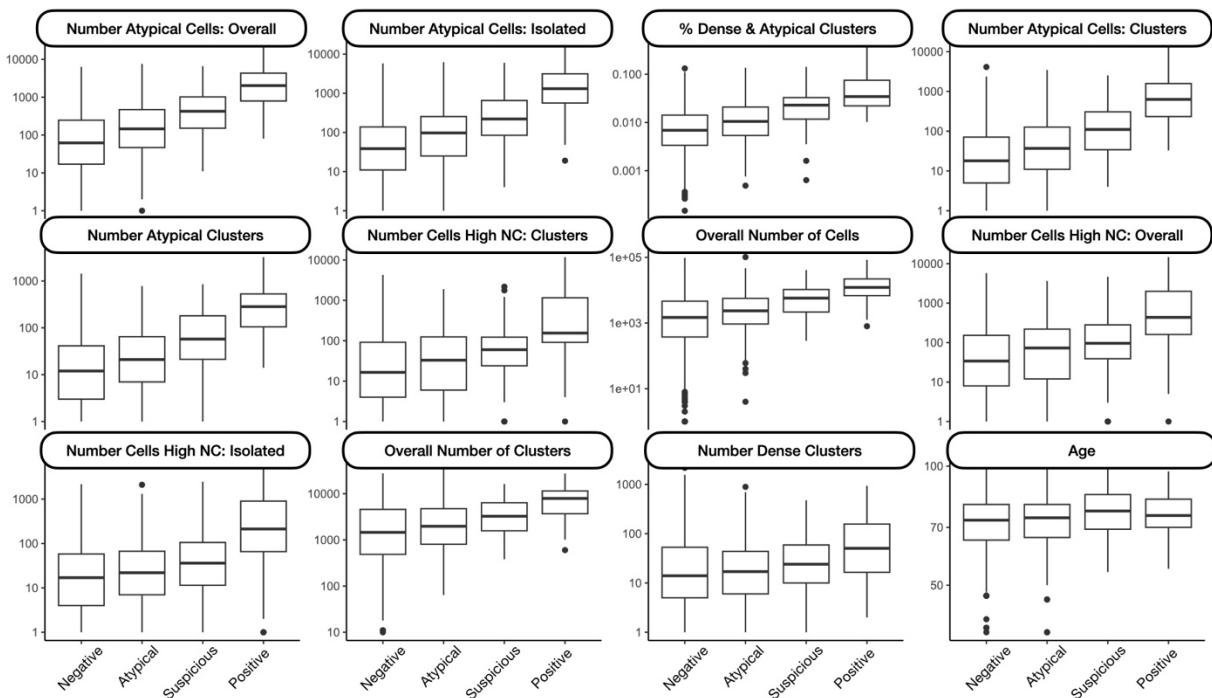

1034 **Supplementary Figure 2: Correlation Each Slide Feature and UC Atypia,** ordered by  
 1035 predictiveness of each feature (spearman correlation / ordinal regression)  
 1036  
 1037

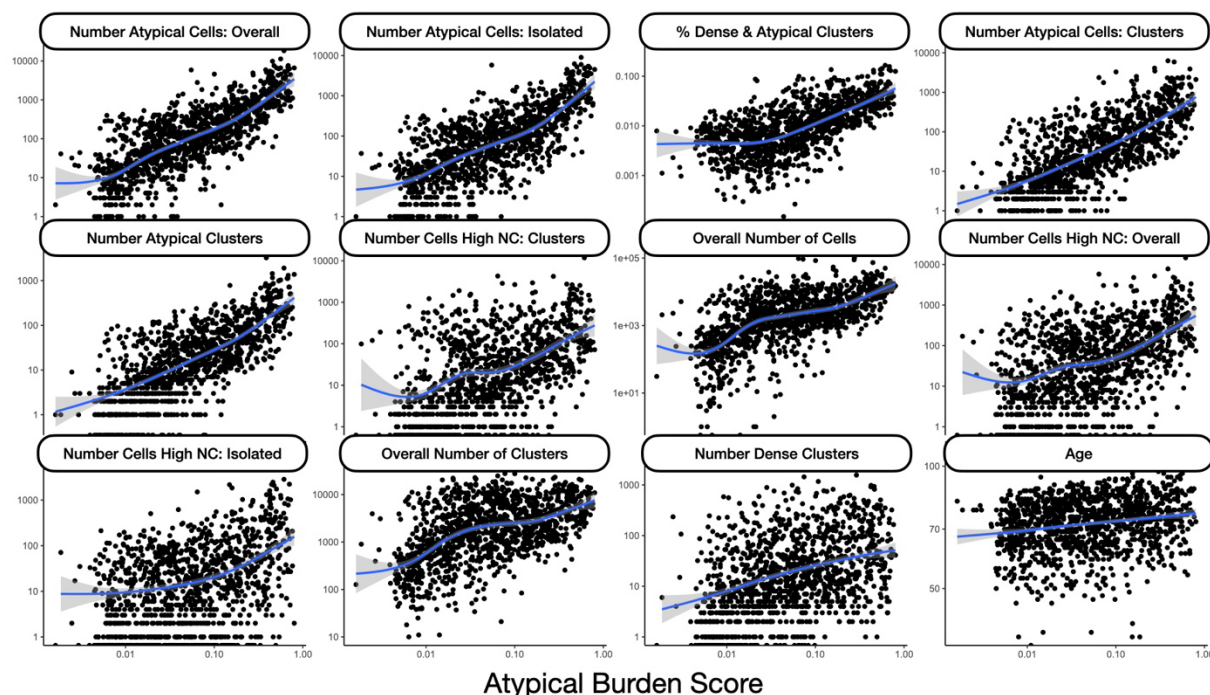

1038  
1039 **Supplementary Figure 3: Correlation Each Slide Feature and ABS**, ordered by  
1040 predictiveness of each feature for UC diagnostic category (spearman correlation / ordinal  
1041 regression)  
1042

1043 **Supplementary Table 1: Spearman correlation between imaging predictors, ABS and original**  
1044 **UC Class**

| Predictor                                | ABS  |         |          |         | Original Diagnosis |         |          |         |  |
|------------------------------------------|------|---------|----------|---------|--------------------|---------|----------|---------|--|
|                                          | r    | 2.5% CI | 97.5% CI | p-value | r                  | 2.5% CI | 97.5% CI | p-value |  |
| Overall number atypical cells            | 0.78 | 0.76    | 0.8      | <0.001  | 0.38               | 0.33    | 0.42     | <0.001  |  |
| Overall number cells with high NC        | 0.53 | 0.48    | 0.56     | <0.001  | 0.27               | 0.22    | 0.32     | <0.001  |  |
| Number of cells                          | 0.63 | 0.6     | 0.67     | <0.001  | 0.29               | 0.24    | 0.34     | <0.001  |  |
| Number of isolated atypical cells        | 0.73 | 0.7     | 0.75     | <0.001  | 0.37               | 0.32    | 0.42     | <0.001  |  |
| Number of isolated cells with high NC    | 0.44 | 0.39    | 0.48     | <0.001  | 0.24               | 0.19    | 0.29     | <0.001  |  |
| Number of atypical cells in clusters     | 0.75 | 0.73    | 0.78     | <0.001  | 0.36               | 0.31    | 0.41     | <0.001  |  |
| Number of cells in clusters with high NC | 0.57 | 0.53    | 0.61     | <0.001  | 0.3                | 0.25    | 0.35     | <0.001  |  |
| Number of dense clusters                 | 0.45 | 0.4     | 0.49     | <0.001  | 0.14               | 0.09    | 0.2      | <0.001  |  |
| Number of clusters                       | 0.53 | 0.49    | 0.57     | <0.001  | 0.21               | 0.15    | 0.26     | <0.001  |  |
| Number of dense/atypical clusters        | 0.68 | 0.65    | 0.71     | <0.001  | 0.37               | 0.32    | 0.41     | <0.001  |  |
| Number of atypical clusters              | 0.77 | 0.75    | 0.79     | <0.001  | 0.36               | 0.31    | 0.41     | <0.001  |  |
| Age                                      | 0.21 | 0.16    | 0.26     | <0.001  | 0.11               | 0.06    | 0.16     | <0.001  |  |

1045  
1046 **Supplementary Table 2: Summary statistics (median, interquartile range) for each slide level**  
1047 **feature and UC Class**

|                                                  | Overall                   | Negative                  | Atypical                  | Suspicious                  | Positive                     | p      |
|--------------------------------------------------|---------------------------|---------------------------|---------------------------|-----------------------------|------------------------------|--------|
| <b>N</b>                                         | <b>1252</b>               | <b>810</b>                | <b>296</b>                | <b>98</b>                   | <b>48</b>                    |        |
| Overall number atypical cells (median [IQR])     | 111.00 [24.00, 374.50]    | 59.00 [16.00, 240.50]     | 145.50 [46.75, 469.00]    | 424.50 [151.50, 1018.50]    | 2029.50 [795.50, 4322.00]    | <0.001 |
| Overall number cells with high NC (median [IQR]) | 39.00 [6.00, 170.50]      | 24.00 [3.00, 120.75]      | 68.00 [10.00, 197.75]     | 96.00 [36.00, 279.25]       | 436.00 [160.50, 1995.75]     | <0.001 |
| Number of cells (median [IQR])                   | 2046.50 [590.25, 5856.25] | 1480.00 [370.25, 4604.25] | 2345.50 [933.50, 5629.50] | 5734.00 [2165.50, 10514.00] | 12178.00 [6810.00, 22094.75] | <0.001 |

|                                                                |                           |                           |                           |                            |                             |        |
|----------------------------------------------------------------|---------------------------|---------------------------|---------------------------|----------------------------|-----------------------------|--------|
| <b>Number of isolated atypical cells (median [IQR])</b>        | 57.50 [14.75, 212.25]     | 36.00 [9.00, 130.25]      | 94.50 [25.00, 252.75]     | 220.50 [84.50, 652.00]     | 1308.50 [565.25, 3127.50]   | <0.001 |
| <b>Number of isolated cells with high NC (median [IQR])</b>    | 11.00 [1.00, 53.00]       | 7.00 [1.00, 38.00]        | 17.00 [3.00, 60.00]       | 28.00 [6.25, 89.75]        | 194.00 [51.00, 821.00]      | <0.001 |
| <b>Number of atypical cells in clusters (median [IQR])</b>     | 24.00 [5.00, 110.25]      | 15.00 [3.00, 65.00]       | 36.00 [10.00, 123.75]     | 110.50 [34.25, 306.75]     | 631.50 [236.75, 1578.50]    | <0.001 |
| <b>Number of cells in clusters with high NC (median [IQR])</b> | 16.00 [2.00, 94.25]       | 9.00 [1.00, 53.00]        | 29.00 [5.00, 118.25]      | 59.00 [23.25, 122.00]      | 155.00 [92.25, 1159.25]     | <0.001 |
| <b>Number of dense clusters (median [IQR])</b>                 | 14.00 [4.00, 50.00]       | 11.00 [3.00, 45.75]       | 15.00 [4.75, 40.25]       | 22.50 [9.25, 59.00]        | 51.00 [16.50, 157.00]       | <0.001 |
| <b>Number of clusters (median [IQR])</b>                       | 1838.50 [674.75, 5228.50] | 1455.50 [486.25, 4579.75] | 1974.00 [807.50, 4744.25] | 3255.00 [1574.25, 6367.25] | 7917.50 [3695.50, 11501.00] | <0.001 |
| <b>% clusters dense/atypical (median [IQR])</b>                | 0.01 [0.00, 0.02]         | 0.01 [0.00, 0.01]         | 0.01 [0.01, 0.02]         | 0.02 [0.01, 0.03]          | 0.03 [0.02, 0.07]           | <0.001 |
| <b>Number of atypical clusters (median [IQR])</b>              | 14.50 [3.00, 54.25]       | 9.00 [2.00, 36.00]        | 20.00 [6.00, 62.25]       | 57.50 [21.25, 180.75]      | 283.50 [105.50, 530.50]     | <0.001 |
| <b>ABS (median [IQR])</b>                                      | 0.05 [0.02, 0.15]         | 0.03 [0.01, 0.08]         | 0.07 [0.03, 0.18]         | 0.24 [0.15, 0.40]          | 0.42 [0.29, 0.57]           | <0.001 |

1048

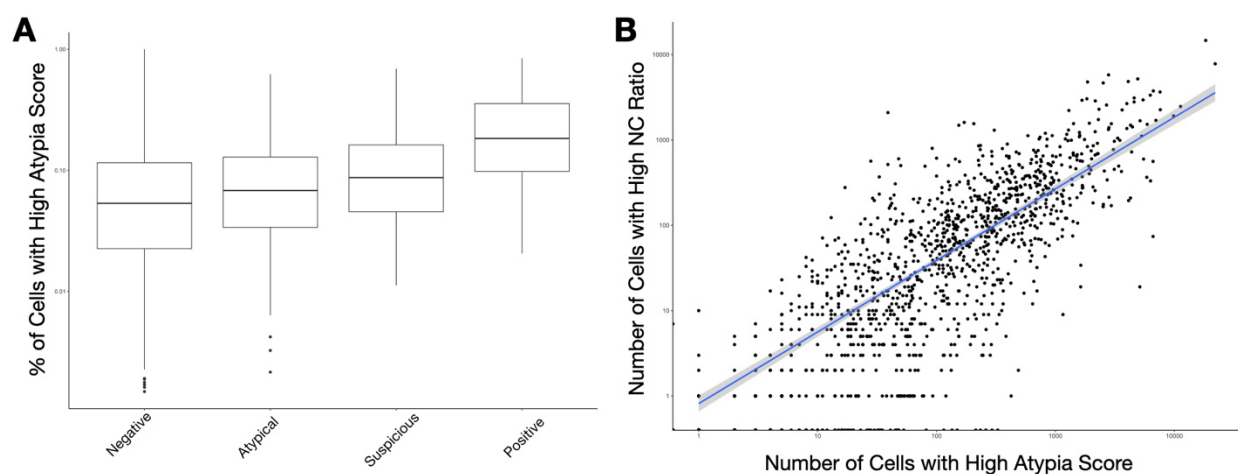

1049

1050

1051 **Supplementary Figure 4: Additional associations with specimen atypia: A)** Boxplots

1052 depicting correlation between the percentage of urothelial cells with high atypia and UC Class;

1053 **B)** Scatterplot demonstrating correlation between slide level atypia via number of cells with high

1054 atypia and high NC ratio

1055

### AUTOPARIS-X WEB APPLICATION DEMO

Instructions:

[Watch Tutorial](#)

1. Select patient to return atypical burden score.
2. Select urothelial cells using cutoff probability.
3. Select malignant cells using lasso tool.
4. Click 'Toggle Annotations', inspect via WSI/table.

Select Patient: Atypical Burden Score:

Patient 2, Atypical 0.14

Select Urothelial Threshold (0-1):

[More Info](#)

Select Malignant Cells:

[More Info](#)

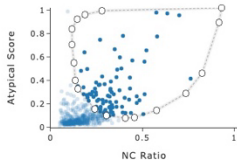

Emphasis on malignant cells?:

[More Info](#)

NO SCALING
  NC RATIO
  ATYPYA SCORE
  UROTHELIAL SCORE

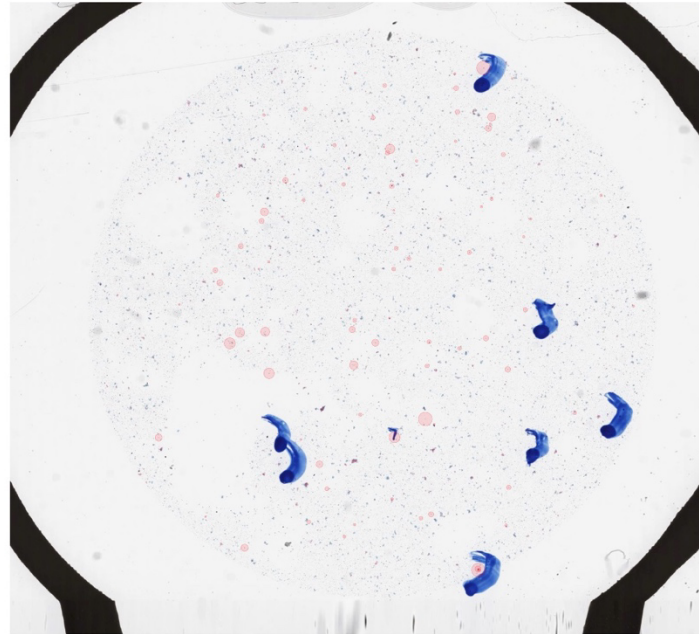

### VIEW MALIGNANT CELL TABLE

Sort table on:

[More Info](#)

NO SORT
  NC RATIO
  ATYPYA SCORE

Max number cells in table:

50 75 100 125 150 175 200

| IMAGE | NC RATIO | ATYPYA |
|-------|----------|--------|
|       | 0.763    | 0.417  |
|       | 0.701    | 0.956  |
|       | 0.636    | 0.972  |
|       | 0.522    | 0.657  |
|       | 0.512    | 0.284  |
|       | 0.511    | 0.561  |
|       | 0.484    | 0.232  |
|       | 0.469    | 0.266  |
|       | 0.445    | 0.572  |
|       | 0.408    | 0.125  |
|       | 0.404    | 0.253  |
|       | 0.393    | 0.128  |
|       | 0.389    | 0.177  |
|       | 0.363    | 0.494  |
|       | 0.359    | 0.429  |
|       | 0.357    | 0.318  |
|       | 0.349    | 0.667  |
|       | 0.344    | 0.284  |
|       | 0.341    | 0.109  |
|       | 0.337    | 0.128  |

1056  
1057  
1058

**Supplementary Figure 5: Example of identifying malignant cells in atypical slide**

### AUTOPARIS-X WEB APPLICATION DEMO

Instructions:

[Watch Tutorial](#)

1. Select patient to return atypical burden score.
2. Select urothelial cells using cutoff probability.
3. Select malignant cells using lasso tool.
4. Click 'Toggle Annotations', inspect via WSI/table.

Select Patient: Atypical Burden Score:

Patient 3, Suspicious 0.6

Select Urothelial Threshold (0-1):

[More Info](#)

Select Malignant Cells:

[More Info](#)

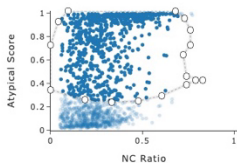

Emphasis on malignant cells?:

[More Info](#)

NO SCALING
  NC RATIO
  ATYPYA SCORE
  UROTHELIAL SCORE

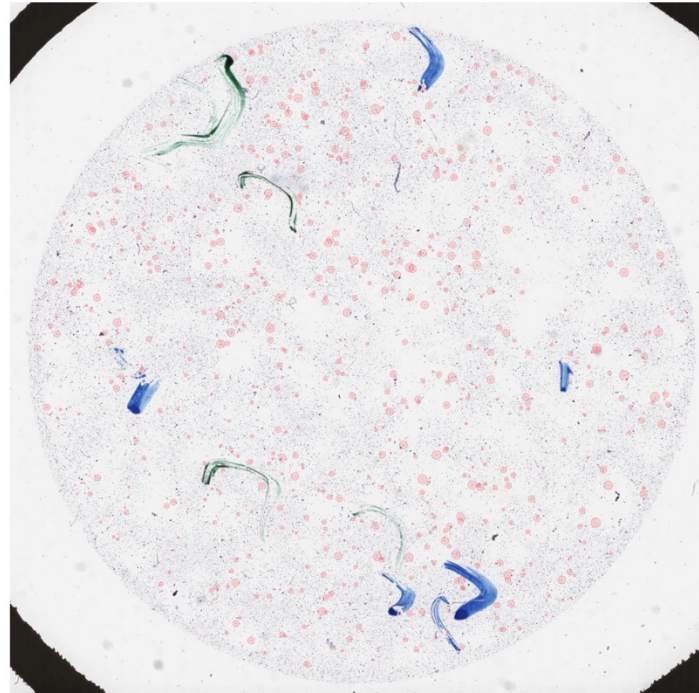

### VIEW MALIGNANT CELL TABLE

Sort table on:

[More Info](#)

NO SORT
  NC RATIO
  ATYPYA SCORE

Max number cells in table:

50 75 100 125 150 175 200

| IMAGE | NC RATIO | ATYPYA |
|-------|----------|--------|
|       | 0.636    | 0.879  |
|       | 0.626    | 0.34   |
|       | 0.594    | 0.995  |
|       | 0.586    | 0.953  |
|       | 0.559    | 0.979  |
|       | 0.538    | 0.82   |
|       | 0.526    | 0.413  |
|       | 0.519    | 0.972  |
|       | 0.499    | 0.992  |
|       | 0.492    | 0.992  |
|       | 0.435    | 0.361  |
|       | 0.423    | 0.868  |
|       | 0.415    | 0.974  |
|       | 0.39     | 0.972  |
|       | 0.385    | 0.434  |
|       | 0.379    | 0.823  |
|       | 0.363    | 0.98   |
|       | 0.35     | 0.275  |
|       | 0.345    | 0.787  |
|       | 0.298    | 0.927  |
|       | 0.295    | 0.85   |

1059  
1060  
1061

**Supplementary Figure 6: Example of identifying malignant cells in suspicious slide**



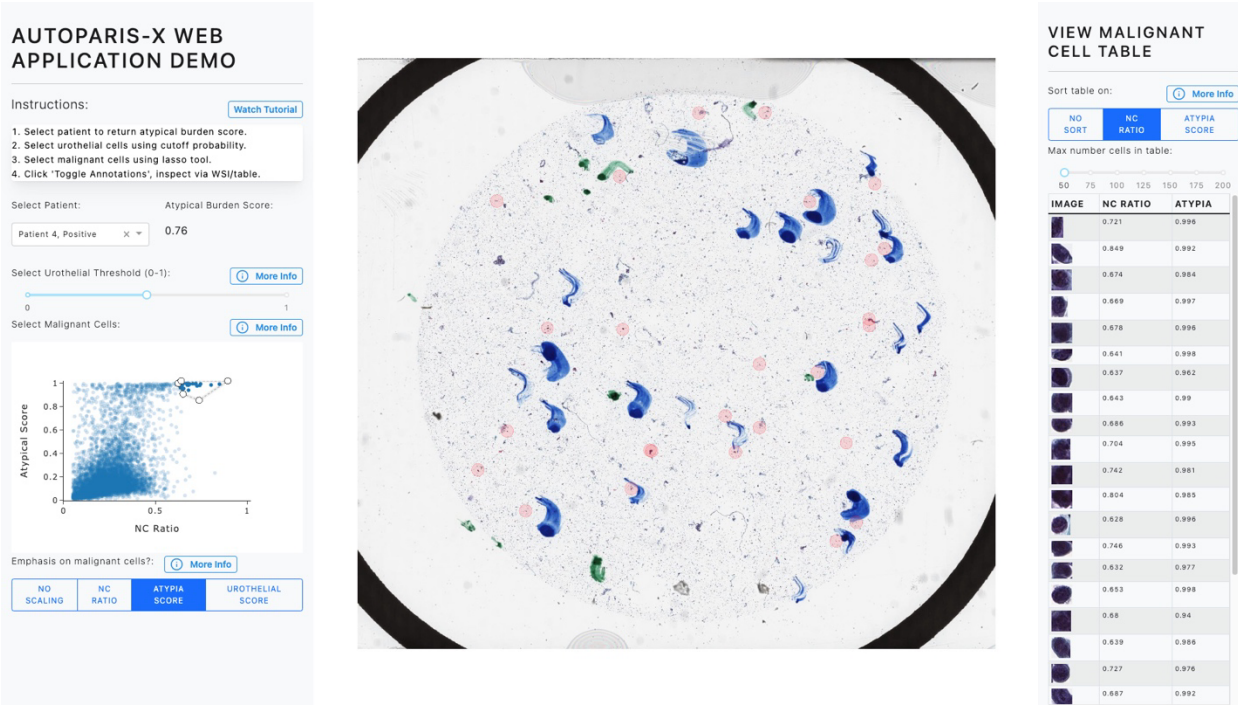

1062  
1063 **Supplementary Figure 7: Example of identifying malignant cells in positive slide, only**  
1064 **focusing on those with high atypia**  
1065

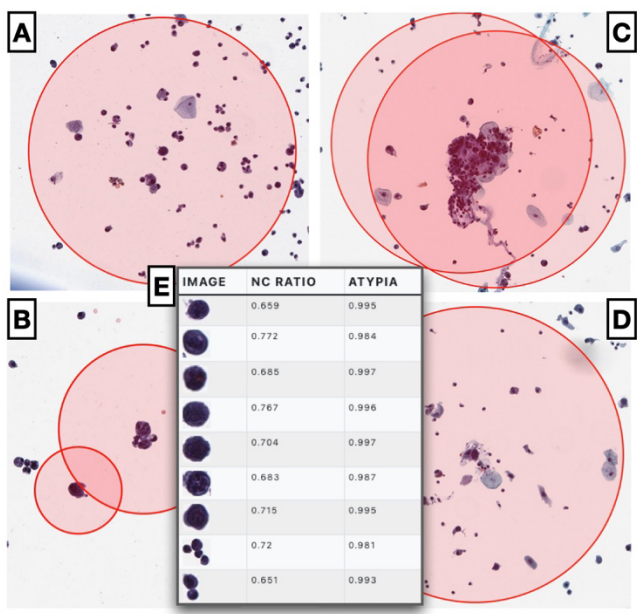

1066  
1067 **Supplementary Figure 8: Example of atypical cells identified using Autoparis-X web**  
1068 **application within demonstration on example atypical/positive slides: A) Isolated cell, B)**  
1069 **Two cells with differing atypia; cell with larger red dot has higher atypia, C-D) Focusing on**  
1070 **specific cells identified using BorderDet in hard-to-separate clusters; E) Example table of**  
1071 **malignant cells with reported atypia scores from suspicious case**  
1072  
1073
